# Supplementary material
Source: MDPI journal article supplement (https://www.mdpi.com/2073-4441/13/23/3409)
Supplement: s1 [file s1]

**Supplementary Materials:**

**Table S1.** Primary WRF, Noah-MP, and WRF-Hydro parameters were used in the simulation.

| Subprocess                                            | Option Selected | Description                                      |
|-------------------------------------------------------|-----------------|--------------------------------------------------|
| Microphysics                                          | 3               | WSM3 Hong, Dudhia and Chen [103]                 |
| Radiation                                             | 3               | CAM [104]                                        |
| PBL physics                                           | 1               | YSU [105]                                        |
| Dynamic vegetation                                    | 4               | Off (LAI from table; FVGE=maximum veg. fraction) |
| Stomatal resistance                                   | 1               | Ball-Berry [106]                                 |
| Surface layer drag coefficient calculation            | 1               | Monin-Obukhov [107]                              |
| Soil moisture factor for stomatal resistance          | 1               | Noah [108]                                       |
| Supercooled liquid water in frozen soil               | 1               | No Iteration [9]                                 |
| Soil permeability                                     | 1               | Linear Effect, More Permeable [9]                |
| Radiative transfer                                    | 3               | Two-stream applied to vegetated fraction         |
| Ground snow surface albedo                            | 2               | CLASS [109]                                      |
| Partitioning precipitation into rainfall and snowfall | 1               | Jordan [110]                                     |
| Soil temperature lower boundary condition             | 2               | TBOT at 8m from input file                       |
| Soil/snow temperature-time scheme                     | 1               | Semi-implicit                                    |
| Glacier treatment                                     | 2               | Slab ice                                         |
| Channel_option                                        | 3               | Diff. Wave-gridded                               |
| Baseflow                                              | 1               | Exp. Bucket                                      |
